# Supplementary material for: TRIM24 Expression as an Independent Biomarker for Prognosis and Tumor Recurrence in HNSCC
Source: MDPI journal article supplement (doi:10.3390/jpm12060991), 2022-06-17
Supplement: s1 [file s1]

## Supplementary Materials

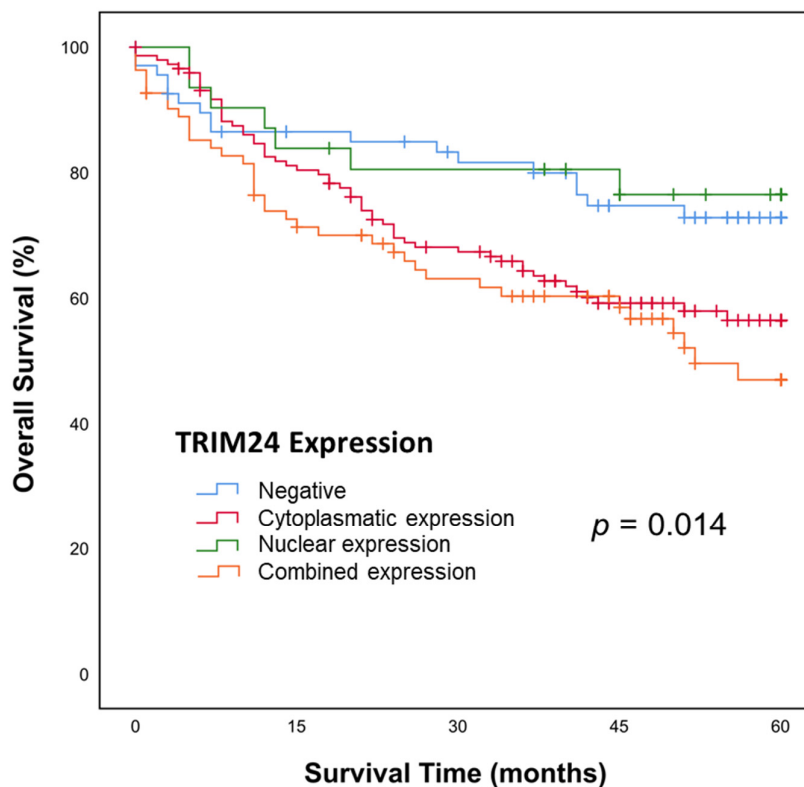

**Figure S1.** Kaplan Meier analyses of TRIM24 expressing HNSCC PTs. There is a significant difference in the OS rates over 60 months of patients with Negative, Cytoplasmatic, Nuclear and Combined TRIM24 expression (log-rank test,  $p = 0.014$ ). Negative and Nuclear TRIM24 expression showed similar survival rates. So did Cytoplasmatic and Combined TRIM24 expression.

**Table S1.** Clinicopathological characteristics and cytoplasmatic TRIM24 expression in HNSCC.

| Variable              |                       | Cytoplasmatic TRIM24 Expression |                   | Total |
|-----------------------|-----------------------|---------------------------------|-------------------|-------|
|                       |                       | <i>n</i> Positive               | <i>n</i> Negative |       |
| Tissue Type           | Primary Tumor         | 237                             | 104               | 341   |
|                       | Lymph Node Metastases | 116                             | 49                | 165   |
|                       | Local Recurrences     | 58                              | 7                 | 65    |
|                       | Distant Metastases    | 21                              | 4                 | 25    |
| Tumor Site            | Pharynx               | 86                              | 66                | 152   |
|                       | Larynx                | 74                              | 26                | 100   |
|                       | Oral Cavity           | 69                              | 10                | 79    |
|                       | n.a.                  |                                 |                   | 10    |
| Sex                   | Female                | 50                              | 27                | 77    |
|                       | Male                  | 186                             | 77                | 263   |
|                       | n.a.                  |                                 |                   | 1     |
| Age (years)           | <61                   | 108                             | 48                | 156   |
|                       | >61                   | 127                             | 56                | 183   |
|                       | n.a.                  |                                 |                   | 2     |
| T stage *             | T1                    | 51                              | 21                | 72    |
|                       | T2                    | 67                              | 33                | 100   |
|                       | T3                    | 70                              | 26                | 96    |
|                       | T4                    | 48                              | 23                | 71    |
|                       | n.a.                  |                                 |                   | 2     |
| N Stage *             | N0                    | 117                             | 34                | 151   |
|                       | N1                    | 24                              | 29                | 53    |
|                       | N2                    | 61                              | 23                | 84    |
|                       | N3                    | 34                              | 16                | 50    |
|                       | n.a.                  |                                 |                   | 3     |
| UICC stage *          | I                     | 44                              | 25                | 69    |
|                       | II                    | 45                              | 16                | 61    |
|                       | III                   | 42                              | 18                | 60    |
|                       | IV                    | 106                             | 44                | 150   |
|                       | n.a.                  |                                 |                   | 1     |
| Lymph Node Metastases | Yes                   | 119                             | 68                | 187   |
|                       | No                    | 117                             | 34                | 151   |
|                       | n.a.                  |                                 |                   | 3     |
| Distant Metastases    | Yes                   | 10                              | 4                 | 14    |
|                       | No                    | 224                             | 99                | 323   |
|                       | n.a.                  |                                 |                   | 5     |
| Local Recurrence      | Yes                   | 64                              | 11                | 75    |
|                       | No                    | 173                             | 93                | 266   |
|                       | n.a.                  |                                 |                   | 0     |
| Immune Infiltration   | Hot                   | 47                              | 19                | 66    |
|                       | Excluded              | 99                              | 47                | 146   |
|                       | Cold                  | 48                              | 21                | 69    |
|                       | n.a.                  |                                 |                   | 60    |
| Alcohol Consumption   | Yes                   | 105                             | 38                | 143   |
|                       | No                    | 123                             | 62                | 185   |
|                       | n.a.                  |                                 |                   | 13    |
| Nicotine Consumption  | Yes                   | 202                             | 84                | 286   |
|                       | No                    | 22                              | 14                | 36    |
|                       | n.a.                  |                                 |                   | 19    |
| P16 Status            | Positive              | 53                              | 36                | 89    |
|                       | Negative              | 184                             | 68                | 252   |
|                       | n.a.                  |                                 |                   | 0     |

n.a. = not available, \* = assessed after the 8th edition of TNM classification.

**Table S2.** Correlation of TRIM24 expression with clinicopathological features of HNSCC patients (Chi's square test).

| Clinicopathological Features |                    | Number of Patients | Cytoplasmatic TRIM24 Expression |            | <i>p</i> -Value |
|------------------------------|--------------------|--------------------|---------------------------------|------------|-----------------|
|                              |                    |                    | % Positive                      | % Negative |                 |
| Age                          | <61 years          | 156                | 69.23%                          | 30.77%     | 0.973           |
|                              | >61 years          | 183                | 69.40%                          | 30.60%     |                 |
| Sex                          | Female             | 77                 | 64.94%                          | 35.06%     | 0.332           |
|                              | Male               | 263                | 70.72%                          | 29.28%     |                 |
| Alcohol Consumption          | Yes                | 143                | 73.43%                          | 26.57%     | 0.176           |
|                              | No                 | 185                | 66.49%                          | 33.51%     |                 |
| Nicotine Consumption         | Yes                | 286                | 70.63%                          | 29.37%     | 0.242           |
|                              | No                 | 36                 | 61.11%                          | 38.89%     |                 |
| Immune Infiltration          | "Cold"             | 69                 | 69.57%                          | 30.43%     | 0.913           |
|                              | "Hot" + "Excluded" | 212                | 68.87%                          | 31.13%     |                 |

\* = significant result.
